# Supplementary material
Source: ML conference proceedings conference paper supplement (https://openaccess.thecvf.com/content/ICCV2025/html/Cen_C2MIL_Synchronizing_Semantic_ICCV_2025_paper.html)
Supplement: Supplementary file 1 [file Cen_C2MIL_Synchronizing_Semantic_ICCV_2025_supplemental.pdf]

# C<sup>2</sup>MIL: Synchronizing Semantic and Topological Causalities in Multiple Instance Learning for Robust and Interpretable Survival Analysis

## Supplementary Material

### 6. Method Supplementary

#### 6.1. Graph Transformer Architecture Description

Graph Transformer [41] consists of  $L$  stacked identical layers, each containing multi-head graph attention mechanisms, positional encoding fusion, and position-enhanced feed-forward networks. The architecture is formally defined as follows:

**Input Representation.** Let graph  $G = (V, E)$  contain  $n$  nodes, where each node  $i$  has feature vector  $h_i \in \mathbb{R}^d$ , with adjacency matrix  $A \in \{0, 1\}^{n \times n}$ . The input feature matrix is  $H^{(0)} = [h_1, \dots, h_n]^T \in \mathbb{R}^{n \times d}$ .

**Relative Posit Encoding.** The encoder structural relationship uses random walk probabilities:

$$\mathbf{R}_{ij} = \text{Softmax} \left( \frac{\log(P_{ij})}{\sqrt{d}} \right), \quad (18)$$

where  $P \in \mathbb{R}^{n \times n}$  is the random walk transition probability matrix computed using k-step truncated values.

**Multi-head Graph Attention Mechanism.** For the  $h$ -th attention head in layer  $l$ :

$$\begin{aligned} \mathbf{Q}^{(h)} &= \mathbf{H}^{(l)} \mathbf{W}_Q^{(h)}, \mathbf{K}^{(h)} = \mathbf{H}^{(l)} \mathbf{W}_K^{(h)}, \mathbf{V}^{(h)} = \mathbf{H}^{(l)} \mathbf{W}_V^{(h)}, \\ \alpha_{ij}^{(h)} &= \frac{\exp \left( \sigma \left( \frac{\mathbf{Q}_i^{(h)} (\mathbf{K}_j^{(h)})^\top}{\sqrt{d/H}} + \phi(A_{ij}) \right) \right)}{\sum_{k \in \mathcal{N}_i} \exp \left( \sigma \left( \frac{\mathbf{Q}_i^{(h)} (\mathbf{K}_k^{(h)})^\top}{\sqrt{d/H}} + \phi(A_{ik}) \right) \right)}, \end{aligned} \quad (19)$$

where  $\phi : \mathbb{R} \rightarrow \mathbb{R}$  is an edge information mapping function,  $\sigma$  denotes LeakyReLU activation, and  $H$  is the number of attention heads.

**Structure-Aware Attention Aggragation.**

$$\mathbf{Z}^{(h)} = \text{Softmax}(\alpha^{(h)}) \mathbf{V}^{(h)} + \mathbf{R} \circ (\alpha^{(h)} \mathbf{V}^{(h)}), \quad (20)$$

where  $\circ$  denotes the Hadamard product. The multi-head output is concatenated:

$$\hat{\mathbf{H}}^{(l)} = \parallel_{h=1}^H \mathbf{Z}^{(h)} \mathbf{W}_O^{(h)}. \quad (21)$$

**Residual Connection & Layer Normalization.**

$$\bar{\mathbf{H}}^{(l)} = \text{LayerNorm} \left( \mathbf{H}^{(l)} + \hat{\mathbf{H}}^{(l)} \right). \quad (22)$$

**Position-Enhanced Feed-Forward Network.**

$$\mathbf{H}^{(l+1)} = \text{LayerNorm} \left( \bar{\mathbf{H}}^{(l)} + \mathbf{W}_2 \cdot \text{GELU}(\mathbf{W}_1 \bar{\mathbf{H}}^{(l)} + \mathbf{b}_1) + \mathbf{b}_2 \right). \quad (23)$$

where  $\mathbf{W}_1 \in \mathbb{R}^{4d \times d}$  and  $\mathbf{W}_2 \in \mathbb{R}^{d \times 4d}$  are learnable parameters.

**Output Layer** Final node representations are obtained via K-hop neighborhood pooling:

$$\mathbf{y}_i = \sum_{k=0}^K \gamma_k \cdot \text{MEAN} \left( \{ \mathbf{H}_j^{(L)} | j \in \mathcal{N}_k(i) \} \right), \quad (24)$$

where  $\eta_k$  are learnable decay coefficients.

#### 6.2. Subgraph Sampling Pseudocodes

---

##### Algorithm 1 Subgraph Sampling

---

Input: Adjusted graph  $G(\tilde{V}, E, A)$ ; Linear  $\text{MLP}(\cdot)$ ; Graph Transformer Model  $GT(\cdot)$ ; subgraph( $\cdot, \cdot$ ) function of graph containing the mask nodes; Activation function sigmoid  $\sigma(\cdot)$ .

**Output:** Causal graph  $C$  and non-causal graph  $S$ .

- 1:  $G'.V = \text{MLP}(G.V)$
  - 2:  $G'.E = G.E$
  - 3:  $G'.A = [G'.V_i; G'.V_j] \langle i, j \rangle \in G.E$
  - 4:  $P = \sigma(GT(G'))$
  - 5: **if** training stage **then**
  - 6:   sample = Bernoulli( $P$ )
  - 7:   mask = sample.detach() +  $P - P.\text{detach}()$
  - 8:    $C = \text{subgraph}(G', \text{mask})$
  - 9:    $S = \text{subgraph}(G', 1 - \text{mask})$
  - 10: **else**
  - 11:    $C = \text{subgraph}(G', P)$
  - 12:    $S = \text{subgraph}(G', 1 - P)$
- 

### 7. Experiments Supplementary

#### 7.1. Implement Details

A pretrained UNI is used to extract features from both thumbnails and patches. The thumbnails are derived from WSIs at  $40 \times$  magnification with a  $30 \times$  downsampling. The patches are obtained by segmenting WSIs at  $40 \times$  magnification into images of size  $1024 \times 1024$  pixels. Before being fed into the feature extractor, both thumbnails and patches are resized to  $224 \times 224$ . Patches in a WSI is constructed as a graph by K nearest neighborhood (KNN) through the coordinates of patches. The proposed framework is implemented with PyTorch [29] and PyTorch Geometric [10] and all the experiments are conducted on one

NVIDIA A100 GPU with 40GB memory with batch size 16 and 100 epochs. The warm-up epoch is 2 on internal experiments and 10 on external experiments.

## 7.2. Results of Adaptive Cluster Number (K) Analysis

Specific value in Section 4.3

|                          | TCGA-KIRC     | TCGA-ESCA     | TCGA-BLCA     |
|--------------------------|---------------|---------------|---------------|
| $K = 2$                  | 0.6775        | 0.6591        | 0.5905        |
| $K = 3$                  | 0.6920        | 0.6684        | 0.5775        |
| $K = 4$                  | 0.6844        | 0.6418        | 0.5762        |
| $K = 5$                  | 0.6795        | 0.6557        | 0.5934        |
| $K = 6$                  | 0.6893        | 0.6445        | 0.5812        |
| Adaptive clusters (Ours) | <b>0.7078</b> | <b>0.6904</b> | <b>0.6081</b> |
| Oracle clusters          | 0.7131        | 0.6949        | 0.6098        |

Table 4. Predictive performance analysis of the adaptive optimal clustering number method compared with fixed number  $K$  of clusters.
